# Supplementary material
Source: publisher site journal article supplement (https://www.dovepress.com/article/488525)
Supplement: Supplementary file 1 [file get_supplementary_file.php]

**Supplementary Table S1 Perioperative adverse events of included studies.**

| Studies | Intervention in groups | Perioperative adverse reactions (n, %) | | | | | | | | | | | | | | |
| --- | --- | --- | --- | --- | --- | --- | --- | --- | --- | --- | --- | --- | --- | --- | --- | --- |
| Nausea | Vomiting | Drowsiness | Tumidness | Uroschesis | Respiratory depression | Acupuncture syncope reaction | Local earache | Vertigo | Bradycardia | Pruritus | Auricular hemorrhage | Headache | Hip pain | Anxiety |
| Liao 2020 | AA + Multimodal analgesia | 2 (10%) | 1 (5%) | - | - | - | - | - | - | - | - | - | - | - | - | - |
| SAA+ Multimodal analgesia | 4 (20%) | 3 (15%) | 1 (5%) | 1 (5%) | - | - | - | - | - | - | - | - | - | - | - |
| Wang 2012 | AA | 2 (6.45%) | 1 (3.23%) | 1 (3.23%) | - | 2 (6.45%) | 1 (3.23%) | - | - | - | - | - | - | - | - | - |
| SAA | 6 (20.69%) | 5 (17.24%) | 7 (24.14%) | - | 5 (17.24%) | 2 (6.9%) | - | - | - | - | - | - | - | - | - |
| Deng 2013 | AA | - | - | - | - | - | - | 3 (7.14%) | - | - | - | - | - | - | - | - |
| Analgesic | - | - | - | - | - | - | - | - | - | - | - | - | - | - | - |
| Wang 2022 | AA | 2 (10%) | - | - | - | - | - | - | 3 (15%) | - | - | - | - | - | - | - |
| SAA | 4 (20%) | - | - | - | - | - | - |  | - | - | - | - | - | - | - |
| Usichenko 2007 | AA+ Standard analgesia | 10(16.39%) | 2 (3.28%) | 10 (16.39%) | - | - | - | - | - | 1 (1.64%) | 6 (9.84%) | - | - | - | - | - |
| SAA+ Standard analgesia | 13 (22.03%) | - | 14 (23.73%) | - | - | - | - | 1 (1.69%) | 2 (3.39%) | 11 (18.64%) | - | - | - | - | - |
| Usichenko 2005 | AA+ Standard analgesia | 7 (24.14%) | 4 (13.79%) | 14 (48.28%) | - | - | - | - | 1 (3.45%) | - | - | 2 (6.9%) | 1 (3.45%) | 1 (3.45%) | 2 (6.9%) | - |
| SAA+ Standard analgesia | 4 (16%) | 4 (16%) | 16 (64%) | - | - | - | - | 2 (8%) | - | - | 2 (8%) | 1 (4%) | - | - | - |
| Sator-Katzenschlager 2006 | EAA+PCA | 7 (21.88%) | - | - | - | - | - | - | - | - | - | - | - | - | - | - |
| AA+PCA | 5 (15.63%) | - | - | - | - | - | - | - | - | - | - | - | - | - | - |
| SAA+PCA | 9 (31.03%) | 2 (6.9%) | - | - | - | - | - | - | - | - | - | - | - | - | - |
| Plunkett 2018 | AA | 6 (13.33%) | 3 (6.67%) | - | - | - | - | - | - | - | - | - | - | - | - | - |
| None | 3 (6%) | 2 (4%) | - | - | - | - | - | - | - | - | - | - | - | - | - |
| Hendawy 2020 | EAA | - | - | - | - | - | - | - | - | - | - | - | - | - | - | - |
| None | 20 (71.43%) | 4 (14.29%) | - | - | - | - | - | - | - | - | - | - | - | - | - |
| Baldawi 2022 | AA | 1 (2.78%) | - | - | - | - | - | - | - | - | - | - | - | - | - | 4 (11.11%) |
| SAA | 36/13 (36.11%) | 11 (30.56%) | - | - | - | - | - | - | - | - | - | - | - | - | 5 (13.89%) |
| Wetzel 2012 | AA | 57/4 (7.02%) | 2 (3.51%) | - | - | - | - | - | - | - | 8 (14.04%) | - | - | - | - | - |
| SAA | 59/6 (10.17%) | 5 (8.47%) | - | - | - | - | - | - | - | 9 (15.25%) | - | - | - | - | - |

**Notes:** **Abbreviations:** AA, Auricular Acupuncture; SAA, Sham Auricular Acupuncture; EAA, electroauricular acupuncture; PCA, patient controlled analgesia.

**Supplementary Table S2. GRADE Table**

| Outcomes | Certainty assessment | | | | | Quality of evidence |
| --- | --- | --- | --- | --- | --- | --- |
| Risk of bias | Inconsistency | Indirectness | Imprecision | Publication bias |
| Pain Intensity | Not serious | Very seriousa | Not serious | Not serious | Seriousc | Very low |
| Analgesia Requirement | Not serious | Very seriousa | Not serious | Not serious | Seriousc | Very low |
| Anxiety scores | Not serious | Very seriousa | Not serious | Very seriousb | Seriousc | Very low |

**Notes:**

**Abbreviations:** GRADE, Grading of Recommendations Assessment, Development, and Evaluation.

a The confidence interval overlap less, the heterogeneity test P was very small, and the *I2* was larger (*I2* threshold value: 50%).

b The total sample size included in the study was small，and the 95% confidence interval exceeded the equivalence line.

c Funnel plot was not symmetrical.

**Supplementary Table S3.** **Frequency of acupuncture points.**

| Acupounts | Frequency | Location |
| --- | --- | --- |
| Shen Men | 20 | Triangular fossa |
| Thalamus | 7 | Antitragus |
| Subcortical Point | 6 | Antitragus |
| Lung | 5 | Cavum conchae |
| Point Zero | 5 | Crus of helix |
| Cingulate gyrus | 4 | Interscreen notch |
| Sympathetic nerve | 4 | Inferior crus |
| Omega 2 | 3 | Spine of helix |
| Knee joint | 3 | Superior crus |
| Tranquiliser | 1 | Tragus |
| Master cerebral | 1 | Earlobe |
| Hip | 2 | Inferior crus |
| Endocrinology | 2 | Cavum conchae |
| Uterus | 4 | Triangular fossa |
| Cervix | 2 | Triangular fossa |
| Hypothalamus | 1 | Antitragus |
| Analgesia Point 3 | 1 | Antitragus |
| Tooth | 1 | Earlobe |
| Mouth | 1 | Cavum conchae |
| Cushion | 1 | Scapha |
| Groin | 1 | Antihelix |
| Liver | 1 | Cymba conchae |
| Internal genitalia | 1 | Inferior crus |
| Internal nose | 1 | Tragus |
| Nasus externus | 1 | Tragus |
| Spleen | 1 | Cavum conchae |
| Stomach | 1 | Cymba conchae |


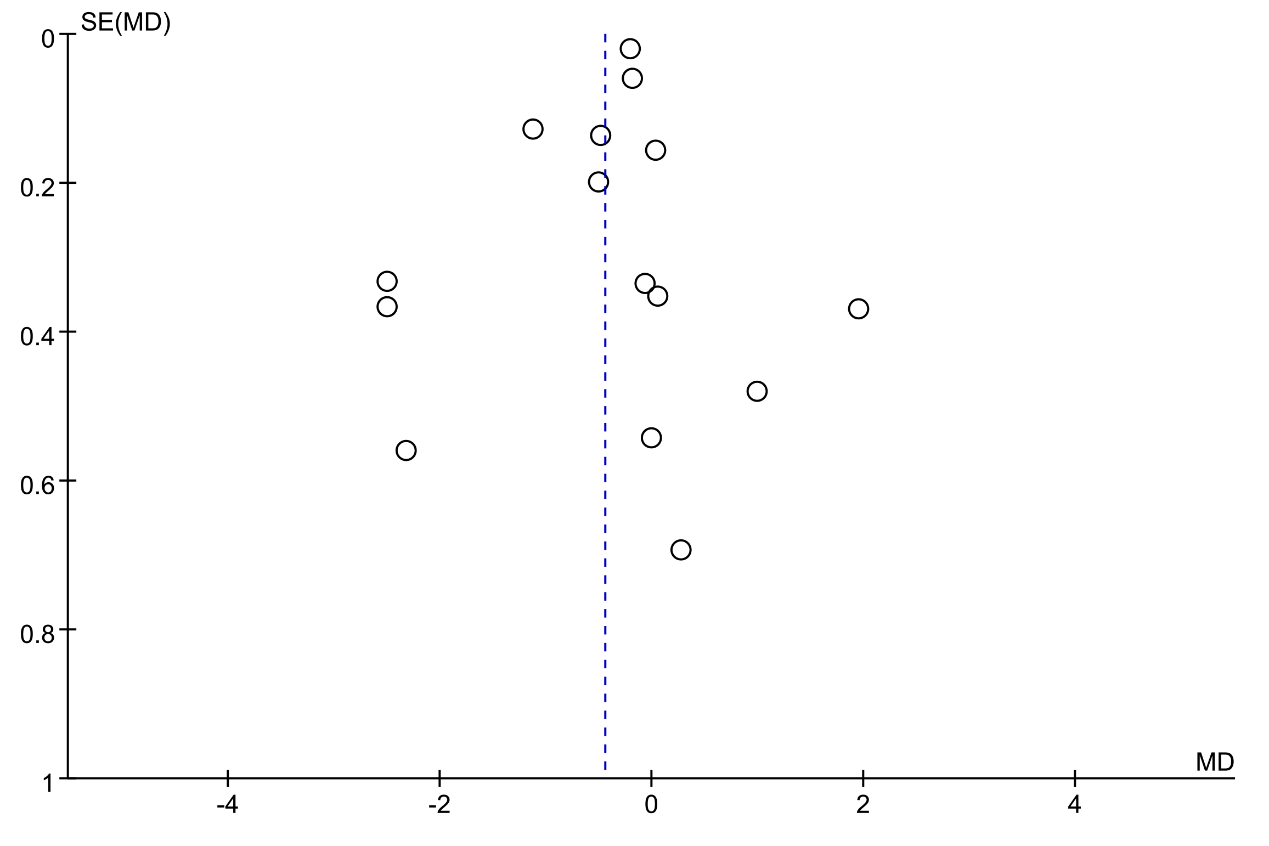


Figure S1. The funnel plots of the 15 studies on pain intensity.
